# Supplementary material for: Interfacial activity and Pickering stabilization of kraft lignin particles obtained by solvent fractionation
Source: Royal Society of Chemistry journal article supplement (doi:10.1039/d3gc00692a), 2023-01-01
Supplement: d3gc00692a1.pdf [file d3gc00692a1.pdf]

Electronic Supplementary Material (ESI) for Green Chemistry.

Supplementary Information

## **Interfacial activity and Pickering stabilization of kraft lignin particles obtained by solvent fractionation**

*Jing Tian<sup>a,b</sup>, Jingqian Chen<sup>b</sup>, Peipei Wang<sup>a,b</sup>, Jiaqi Guo<sup>a</sup>, Wenyuan Zhu<sup>a</sup>, Mohammad Rizwan*

*Khan<sup>c</sup>, Yongcan Jin<sup>a</sup>, Junlong Song<sup>\*,a</sup>, Orlando J. Rojas<sup>\*,b,d</sup>*

<sup>a</sup> Jiangsu Co-Innovation Center for Efficient Processing and Utilization of Forest Resources and International Innovation Center for Forest Chemicals and Materials, Nanjing Forestry University, Nanjing, 210037, China;

<sup>b</sup> Bioproducts Institute, Department of Chemical and Biological Engineering, Department of Chemistry and Department of Wood Science, University of British Columbia, 2360 East Mall, Vancouver, BC V6T 1Z3, Canada;

<sup>c</sup> Department of Chemistry, College of Science, King Saud University, Riyadh 11451, Saudi Arabia;

<sup>d</sup> Department of Bioproducts and Biosystems, School of Chemical Engineering, Aalto University, Vuorimiehentie 1, FI-00076, Espoo, Finland.

\*Corresponding authors: Junlong Song (junlong.song@njfu.edu.cn) and Orlando J. Rojas (orlando.rojas@ubc.ca)

The yield of three lignin fractions ( $F_n$ -KL) was calculated by gravimetric method. Briefly, dispersion of  $F_1$ -KL was obtained as the supernatant after centrifugation for raw lignin sufficiently dissolved in pure water (solid-to-liquid ratio of 1:50 mass/volume). The supernatant was concentrated by rotary evaporation and then dried. The precipitation was dried and dissolved in pure THF, and the second fraction  $F_2$ -KL which was totally dissolved in THF, was taken from the supernatant after centrifugation. The supernatant was concentrated by rotary evaporation, then dried and weighed. The precipitation was dried, and the last fraction ( $F_3$ -KL) was obtained. Groups 1 and 2 were conducted at the same time. Groups 3 and 4 were conducted at the same time.

**Table S1:** the yield of three fractionated KL

| Fraction KL(10g) | Group 1 | Group 2 | Group 3 | Group 4 | average    |
|------------------|---------|---------|---------|---------|------------|
| $F_1$ -KL yield  | 9.4%    | 9.4%    | 14%     | 14%     | 9.45%±6.4  |
| $F_2$ -KL yield  | 23%     | 24%     | 17%     | 15%     | 19.75%±4.4 |
| $F_3$ -KL yield  | 66%     | 60%     | 69%     | 71%     | 66.5%±4.8  |

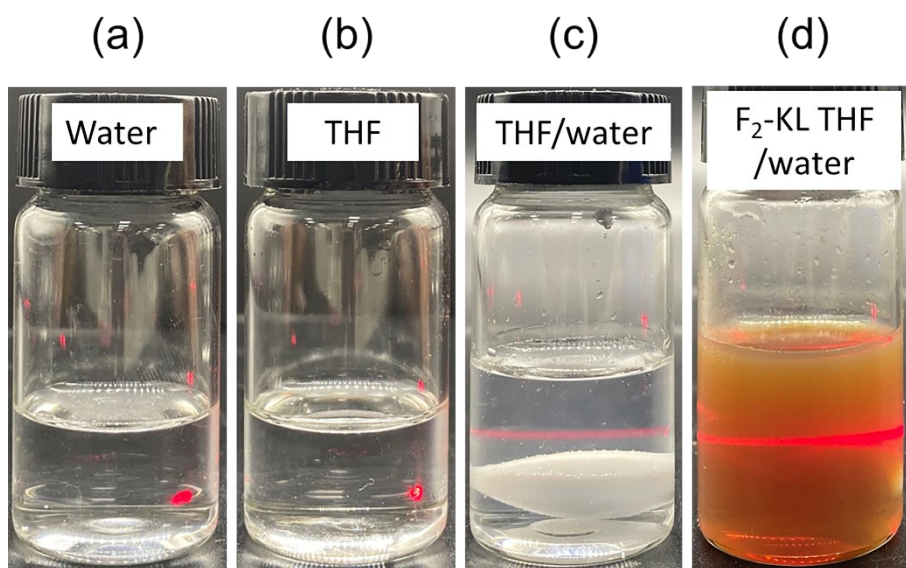

**Fig. S1** Tyndall effect of THF/Water solvent mixtures. No Tyndall phenomenon was observed in (a) pure water and, (b) pure THF. However, an apparent transient Tyndall effect was observed in (c) a mixture of THF and water (water ratio of 80 vol%) and (d) F<sub>2</sub>-KL (lignin dissolved in THF at a concentration of 50 mg/mL and then dispersed in a large volume of water, THF: water = 20: 80 v:v). Images a-c were taken 10 min after solution preparation, while 2 h were used for d.

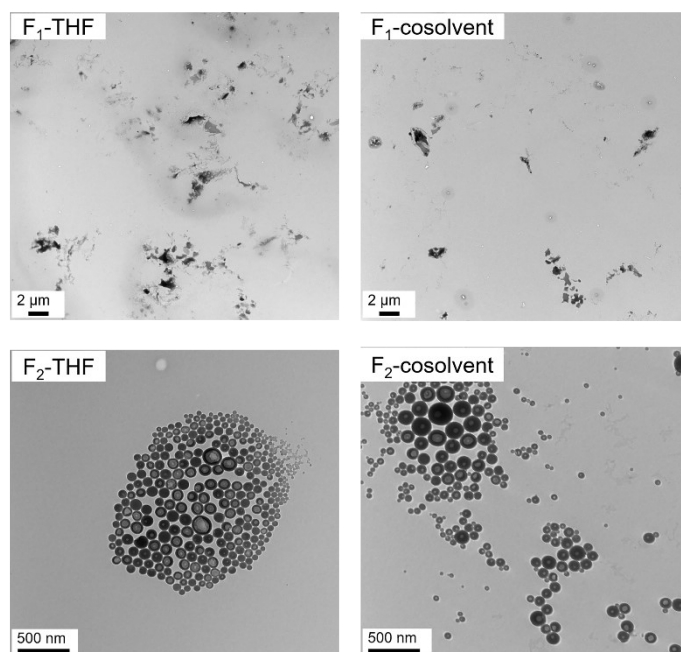

**Fig. S2** The effect of the initial solvent on particle formation. F<sub>1</sub>- and F<sub>2</sub>-KL were dissolved in the THF/H<sub>2</sub>O cosolvent and then precipitated in water following the same procedure.

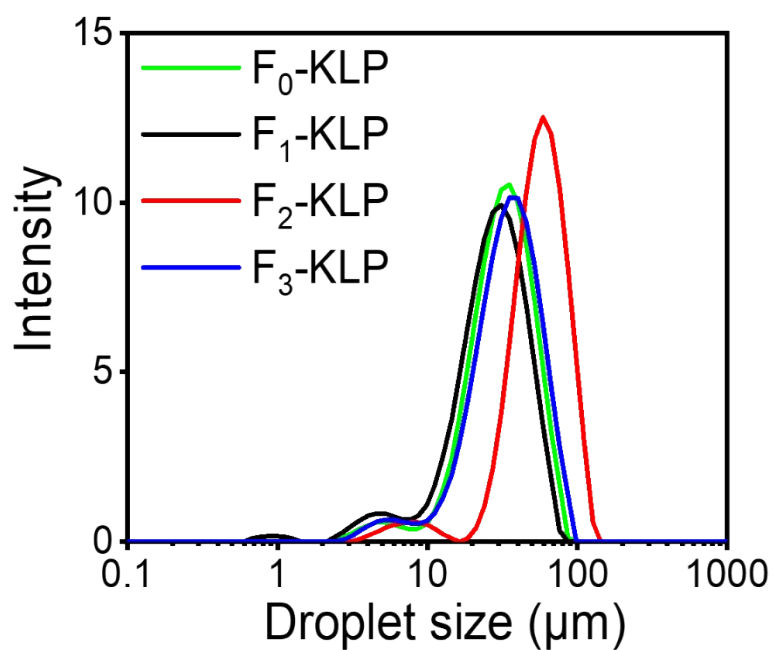

**Fig. S3** Droplet size distribution of Pickering emulsions based on  $F_n$ -KLP, the concentration of  $F_n$ -KLP was set as 0.5%.

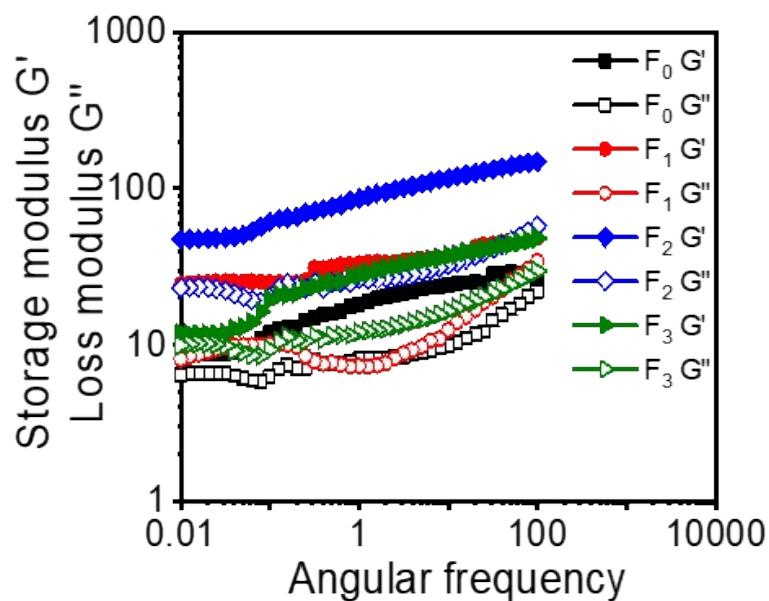

**Fig. S4** Frequency sweep of Pickering emulsions based on  $F_n$ -KLP, the concentration of  $F_n$ -KLP was set as 0.5% during the emulsification process.
